# Supplementary material for: Impact of elevated anti-apoptotic MCL-1 and BCL-2 on the development and treatment of MLL-AF9 AML in mice
Source: PubMed Central journal article supplement (PMC6748137; doi:10.1038/s41418-018-0209-1), 2018-11-23

## Anstee et al Supplementary Information

### Supplementary Materials and Methods

**Mice.** VavP-*Mcl-1*(33) transgenic (hereafter *Mcl-1*tg)<sup>1</sup> and vavP-*BCL-2*(69) transgenic (hereafter *BCL-2*tg) mice<sup>2</sup> were generated and maintained on a C57BL/6 (Ly5.2) background at the Walter and Eliza Hall Institute (WEHI) and genotyped as described.<sup>1,2</sup> Experimental protocols were approved by WEHI's Animal Ethics Committee.

**Human cell lines.** MV4;11 and THP-1 were obtained from ATCC (American Type Culture Collection) and Molm-13 from DSMZ (Deutsche Sammlung von Mikroorganismen und Zellkulturen). Culture medium was RPMI 1640 containing 10% FBS, with inclusion of 50 µM 2-mercaptoethanol for THP-1 cells.

**Haemopoietic analysis.** Healthy and sick mice were analysed similarly. Blood was collected via retro-orbital bleed or cardiac puncture. Single-cell suspensions were prepared from spleen and bone marrow (flushed from femurs and tibias). Red blood cells were removed from blood and spleen using 0.168 M ammonium chloride. Peripheral blood cell counts were enumerated using an ADVIA 2120 analyser (Siemens, Erlangen, Germany) and organ cell counts enumerated on a Casy Counter (Scharfe, Reutlingen, Germany). Cell composition was determined by immunostaining and flow cytometry (LSR I flow cytometer, BD Biosciences, Franklin Lakes NJ, USA), using FlowJo Version 9.3.2 (TreeStar, Ashland, OR, USA). Monoclonal antibodies against cell surface markers were produced and labelled (in-house) with biotin, fluorescein isothiocyanate (FITC), R-phycoerythrin (PE) or allophycocyanin (APC). Antibodies used included: RB6-8C5, anti-Gr1; MI/70, anti-Mac1; A201.1, anti-CD45.1; 5.405.125.2, anti-CD45.2; anti-F4/80; RA3-6B2, anti-B220; 5.1, anti-IgM; 1145-2C11, anti-IgD; YTA3.2.1, anti-CD4; 53.6.7.2, anti-CD8; ACK4, anti-cKit.

**Histological analysis.** A combination of lymph node, spleen, pancreas, kidney, liver, ovary, lung, heart, and/or sternum were collected and fixed in 10% formalin. The samples were embedded in paraffin wax and stained with hematoxylin and eosin by WEHI's histology department. For blood films, 2 µL of blood was smeared onto a microscope slide and left to dry overnight. Slides were then stained with May-Grünwald Giemsa. For bone marrow cytospins, cells were diluted in PBS and 1-5x10<sup>4</sup> cells in 200 µL PBS was loaded into a

cytospin cassette. Centrifugation was performed in a Cytospin 3 centrifuge (Thermo Shandon Ltd, Cheshire, UK) at 113 x g for 5 min with low acceleration. The slides were left to air dry overnight then stained with May-Grünwald Giemsa. Sections and films were assessed (blinded as to genotype) using an Olympus BX43 microscope (Olympus, Tokyo, Japan); photographs were taken with an Olympus DP72 camera.

**Drug treatment.** Drugs used in *in vitro* assays or *in vivo* treatments were: etoposide (Pfizer, New York City, NY, USA); daunorubicin (Pfizer); cytarabine (Sigma-Aldrich, St. Louis, MO, USA); bortezomib (LC Laboratories, Woburn, MA, USA); flavopiridol (Selleck Chemicals, Houston, TX, USA); PIK-75 (Selleck Chemicals); SNS-032 (Selleck Chemicals); dinaciclib (Selleck Chemicals); ABT-737 (Active Biochem, Hong Kong, China); ABT-199 (Active Biochem, Hongkong); S63845 (Synthesis MedChem, Victoria, Australia and Active Biochem, Hong Kong); A1131852 (WEHI, Victoria, Australia); idasanutlin RG7388 (Chemgood, VA USA).

Drug sensitivity was determined by flow cytometric analysis of apoptosis or high throughput CellTiter-Glo luminescence (Promega, Madison WI, USA) measurement of metabolic activity. For the former, cells were seeded at  $1 \times 10^5$  cells per well in 96 well plates and incubated for 24 h in IMDM medium (Gibco, Waltham, MA, USA) containing 10% FCS (Gibco) and 6 ng/mL recombinant IL-3 (WEHI cytokine service, Victoria, Australia) and the test drugs, after which annexin V-Alexa647 (made in house) and 4  $\mu\text{g/mL}$  propidium iodide (Sigma-Aldrich) was added and viability (annexin V-PI) assessed using a FACSCalibur (BD Biosciences, Franklin Lakes NJ, USA). For the high-throughput CellTiter-Glo assay, a Microlab STAR Line (Hamilton, Reno, NV, USA) workstation was used to cross-titrate compounds in an 8x8 dose matrix diluted in 2-fold steps. 1000 cells in 40  $\mu\text{L}$  IMDM supplemented with 10% FCS and 6 ng/mL recombinant IL-3 were seeded per well in a 384 well plate using a Multidrop<sup>TM</sup> Combi Reagent dispenser (ThermoFisher Scientific, Waltham MA, USA) and compounds added using the 100 nL pin tool. Cells were incubated at 37°C for 24 h before assessing viability using 25  $\mu\text{L}$  CellTiter-Glo reagent according to the manufacturer's instructions.

**Bliss scores.** Bliss scores were calculated for each drug combination in the indicated dose matrix using the formula  $(A+B) - (A \times B)$  where A and B are the fractional growth inhibitions induced individually by agents A and B at that given dose and totalled to give a "Bliss sum"

value;<sup>3,4</sup> negative integers indicate antagonism, zero indicates additive activity and positive integers indicate synergy.

**Western blotting.** Bcl-2 family protein and p53 expression was analysed pre- and post-treatment. To prevent cell death post-treatment, 25  $\mu$ M Q-VD-OPh (MP Biochemicals, Santa Ana, CA, USA) was added to  $2 \times 10^6$  primary *MLL-AF9* tumour cells and cells were then plated in a 6 well plate in a volume of 2 mL IMDM supplemented with 10% FCS and 6 ng/mL recombinant IL-3. Cells were treated *in vitro* with PIK-75 (Selleck Chemicals, Houston, TX, USA), flavopiridol (Selleck Chemicals), SNS-032 (Selleck Chemicals) or bortezomib (LC Laboratories, Woburn, MA, USA) at indicated concentrations for 6 h, then harvested and frozen at  $-80^{\circ}\text{C}$  until lysates were made for western blotting. Lysates were made from cell pellets using RIPA buffer containing a cOmplete<sup>TM</sup> protease inhibitors (Roche, Basel, Switzerland) and 1 mM phenylmethylsulfonyl fluoride (PMSF) (Sigma-Aldrich, St. Louis, MO, USA). Proteins (25  $\mu$ g) were resolved by electrophoresis on SDS-PAGE (pre-cast 10% Bis-Tris NuPage) gels (Life Technologies, Carlsbad, CA, USA) using MES Running buffer (Life Technologies) then transferred onto nitrocellulose membranes (iBlot, Life Technologies). Membranes were blocked with 5% non-fat dry milk (Devondale, Victoria, Australia) in MT-PBS with 0.1% Tween-20 (Sigma-Aldrich) (PBS-T) and then probed with antibodies for A1/BFL-1 (clone 6D7, WEHI mAb lab; Cell Signaling #D1A1C), BCL-W (rabbit polyclonal, WEHI mAb lab),  $\beta$ -ACTIN (clone AC-74, Sigma, catalog #A2228), BAD (Enzo Life Sciences, catalog #IMG-5665), BAK (clone DF9, WEHI mAb lab), BAX (clone 49F9-13-3, WEHI mAb lab), human BCL-2 (clone Bcl-2-100, WEHI mAb lab), mouse BCL-2 (clone 3F11, WEHI mAb lab), BCL-X<sub>L</sub> (BD Biosciences, catalog #556361), BID (clone 2D1-3, WEHI mAb lab), BIM (Enzo Life Sciences, catalog #ADI-AAP-330E; Stressgen rabbit polyclonal), BMF (clone 17A9, WEHI mAb lab), HSP-70 (clone N6, W Welch USCF), MCL-1 (clone 19C4-15, WEHI mAb lab), NOXA (ProSci, catalog #2437), p53 (Novocastra, catalog #CM5) and PUMA (ProSci, catalog #3043). Blots were then incubated with HRP-conjugated secondary antibodies (Southern Biotech, Birmingham, AL, USA), and visualised using Luminata<sup>TM</sup> Forte western HRP substrate (Merck-Millipore, Billerica, MA, USA) on a ChemiDoc<sup>TM</sup> XRS+ Molecular Imager<sup>®</sup> (Bio-Rad, Hercules, CA, USA). Prior to re-probing, blots were incubated with 0.1% 1 M sodium azide in PBS-T or stripping buffer containing 0.5 mM TrisHCl (Life Technologies), 10% SDS (Amresco, Solon, OH, USA) and 100 mM 2-mercaptoethanol (Sigma-Aldrich) to remove signal of previous antibody.

## Supplementary Figures

**Figure S1** Overexpression of MCL-1 or BCL-2 provokes early accumulation of donor-derived myeloid cells in mice reconstituted with *MLL-AF9* virus-infected foetal liver cells. 3 wk analysis of haemopoietic tissues in mice reconstituted with WT/GFP (light orange, n=7-18), *Mcl-1*tg/GFP (light pink, n = 6-19), *BCL-2*tg/GFP (light blue, n = 8-22), WT/*MLL-AF9* (orange, n = 5-27), *Mcl-1*tg/*MLL-AF9* (pink, n = 7-26) or *BCL-2*tg/*MLL-AF9* (blue, n = 6-25) cells. **(a)** Percentage of donor-derived cells indicated by Ly5.2<sup>+</sup>GFP<sup>+</sup> cells in the spleen, bone marrow and blood. **(b)** Percentage of Mac1<sup>+</sup> cells within the population of donor cells (Ly5.2<sup>+</sup>GFP<sup>+</sup>) in each organ. Data represents mean ± S.E.M. \* p<0.05, \*\* p<0.01, \*\*\* p<0.001, calculated by Student's T test with Welch's correction. See also Table S1.

**Figure S2** *MLL-AF9* expression causes myeloid leukaemia. Flow cytometric analysis of spleen, bone marrow and blood of healthy control mice [reconstituted with WT/GFP (light orange, n = 8), *Mcl-1*tg/GFP (light pink, n = 9), *BCL-2*tg/GFP (light blue, n = 8-9) cells] and sick *MLL-AF9* AML mice at autopsy [reconstituted with WT/*MLL-AF9* (orange, n = 10-13), *Mcl-1*tg/*MLL-AF9* (pink, n = 13) or *BCL-2*tg/*MLL-AF9* (blue, n = 9-13) cells]. **(a, b)** Percentage of donor-derived cells is indicated by **(a)** Ly5.2<sup>+</sup>GFP<sup>+</sup> cells or **(b)** Ly5.1 negative cells. **(c)** Percentage of Mac1<sup>+</sup> cells within Ly5.2<sup>+</sup>GFP<sup>+</sup> population. Data represent mean ± S.E.M. **(d)** FACS plots of bone marrow cells from three sick *Mcl-1*tg/*MLL-AF9* mice (#1780, #1804 and #1854) gated on GFP<sup>+</sup> cells showing variability in the proportion of Mac1<sup>+</sup> and Gr1<sup>+</sup> cells. **(e)** Percentage of Mac1<sup>+</sup> single positive (SP) and Mac1<sup>+</sup>Gr1<sup>+</sup> double positive (DP) cells, when gated on GFP<sup>+</sup> cells, in spleen, bone marrow and blood of sick mice that had been reconstituted with WT/*MLL-AF9* (orange; n = 12-14), *Mcl-1*tg/*MLL-AF9* (pink; n = 15) or *BCL-2*tg/*MLL-AF9* (blue; n = 12-15) cells. Each dot represents an individual mouse and mean ± S.E.M is indicated. \*\* p<0.01, \*\*\* p<0.001, calculated by Student's T test with Welch's correction.

**Figure S3** Histological comparison of sick *MLL-AF9* AML and healthy control mice. **(a)** Sections of spleen, kidney, liver, pancreas and bone marrow stained with hematoxylin and eosin (H&E) of healthy WT/GFP control mouse compared to representative sick WT/*MLL-AF9* (tumour #1834), *Mcl-1*tg/*MLL-AF9* (tumour #1804) and *BCL-2*tg/*MLL-AF9* (tumour #1836) mice. Scale bars: kidney, liver, spleen and pancreas 500 µm, BM 50 µm, BM

(insert) 20  $\mu$ m. **(b)** Arbitrary scores based on degree of infiltration (performed blinded) of kidney, liver and pancreas. H&E sections were assessed for WT/*MLL-AF9* (orange, n = 11-12), *Mcl-1tg/MLL-AF9* (pink, n = 8-10) or *BCL-2tg/MLL-AF9* (blue, n = 6) mice. Each dot represents one mouse and mean  $\pm$  S.E.M is indicated. Black ringed dots indicate mice shown in **(a)**.

**Figure S4** Leukocytosis in sick primary AML mice. **(a)** Representative blood smears from sick mice of the following genotypes: WT/*MLL-AF9* (tumours #1832 and #2025), *Mcl-1tg/MLL-AF9* (tumours #1854 and #2026), *BCL-2tg/MLL-AF9* (tumours #1836 and #2029) and *Bim*<sup>-/-</sup>/*MLL-AF9* (tumours #1157 and #1158). Scale Bars: 20  $\mu$ M, 1000x magnification. **(b)** Differential counts of blood leukocytes in 6-14 sick mice of each genotype. **(c)** Representative bone marrow cytopspins of the following genotypes: WT/*MLL-AF9* (tumours #1533 #2025), *Mcl-1tg/MLL-AF9* (tumours #1805, #2026) and *BCL-2tg/MLL-AF9* (tumours #1806, #1856), *Bim*<sup>-/-</sup>/*MLL-AF9* (tumours #1157, #1249). Scale Bars: 20  $\mu$ M, 1000x magnification. **(d)** Differential counts of myeloid cell types in bone marrow of 4-9 mice of each genotype. Each dot represents one mouse and mean  $\pm$  S.E.M is indicated. \* p<0.05, \*\* p<0.01, \*\*\* p<0.001, calculated by Student's T test with Welch's correction.

**Figure S5** Differential counts of primary, secondary and tertiary *MLL-AF9* AMLs. Bone marrow cytopspins from primary (a), secondary (b) and tertiary (c) tumour-bearing mice were stained with May-Grünwald Giemsa and scored (blinded) for morphology by haematologist APN. Individual data points are presented as mean  $\pm$  SD. Secondary AMLs were generated by injecting 2 x 10<sup>6</sup> spleen cells from primary AML-bearing mice into immunocompetent syngeneic secondary recipients via the tail vein. Tertiary AMLs were generated by injecting 0.5 x 10<sup>6</sup> bone marrow cells from secondary AML-bearing mice into immunocompetent syngeneic tertiary recipients (See Table S3 for transplantation efficiency). Two way ANOVA analysis used to determine significance of differences between WT/*MLL-AF9* and either *Mcl-1tg/MLL-AF9* or *Bcl2tg/MLL-AF9*. \* indicates p value < 0.05, \*\*\* < 0.001, \*\*\*\* < 0.0001.

**Figure S6** Drug sensitivity of cultured primary *MLL-AF9* AMLs. Dose response of WT/*MLL-AF9* (orange), *Mcl-1tg/MLL-AF9* (pink) and *BCL-2tg/MLL-AF9* (blue) primary AML cell lines treated for 24 h with **(a)** chemotherapeutics etoposide, daunorubicin and

cytarabine; proteasome inhibitor bortezomib; CDK7/9 inhibitors flavopiridol, PIK-75, SNS-032 and dinaciclib or **(b)** BH3 mimetics ABT-737 (anti-BCL-2, Bcl-X<sub>L</sub>, BCL-W), ABT-199 (anti-BCL-2), and S63845 (anti-MCL-1). **(c-e)** Similarly, short-term **(c)** WT/*MLL-AF9*, **(d)** *Mcl-1*tg/*MLL-AF9* and **(e)** *BCL-2*tg/*MLL-AF9* primary AML cell lines were treated with chemotherapeutics and BH3 mimetics, as indicated, in the absence (solid bar) and presence (empty bar) of 25  $\mu$ M Q-VD-OPH (QVD) for 24 h. Viability was measured by flow cytometric quantitation of annexin V<sup>-</sup> PI<sup>-</sup> cells, expressed relative to untreated controls. 2-6 technical replicates per independent tumour were averaged. Data plotted are average response of 5-11 independent tumours per genotype  $\pm$  S.E.M. Not all tumours were treated with all drugs. \* p<0.05, calculated by Student's T test with Welch's correction (pink asterisk indicates significant difference between WT/*MLL-AF9* versus *Mcl-1*tg/*MLL-AF9*; blue asterisk indicates significant difference between WT/*MLL-AF9* versus *BCL-2*tg/*MLL-AF9*; black asterisk indicates significant difference between *Mcl-1*tg/*MLL-AF9* versus *BCL-2*tg/*MLL-AF9*). WT/*MLL-AF9* tumours: #1501, #1502, #1503, #1533, #1559, #1742, #1744, #1746, #1802, #1833, #1834, #2036. *Mcl-1*tg/*MLL-AF9* tumours: #1532, #1535, #1536, #1648, #1748, #1750, #1766, #1770, #1780, #1805, #1830, #1854, #2038. *BCL-2*tg/*MLL-AF9* tumours: #1563, #1647, #1751, #1762, #1763, #1764, #1765, #1806, #1807, #1835, #2040.

**Figure S7** Impact of CDK inhibitors and bortezomib on apoptosis regulators in primary AML cell lines. Western blot analysis of expression of BCL-2 family proteins in cell lines derived from primary AMLs: WT/*MLL-AF9* (tumour #1559 left panel), *Mcl-1*tg/*MLL-AF9* (tumour #1766; central panel) and *BCL-2*tg/*MLL-AF9* (tumour #1806; right panel). Cells were incubated for 6 h with no drug, Q-VD-OPh (QVD) only or QVD with addition of PIK-75 (P), flavopiridol (F), SNS-032 (S) or bortezomib (B) at doses indicated (in  $\mu$ M for CDK inhibitors and nM for bortezomib). Molecular weight markers are indicated (kD).

**Figure S8** Testing synergy between ABT-737 and other drugs. Viability of WT/*MLL-AF9* (left), *Mcl-1*tg/*MLL-AF9* (middle) and *BCL-2*tg/*MLL-AF9* (right) primary AML cell lines treated with ABT-737 plus one of cytarabine, bortezomib, flavopiridol, dinaciclib or PIK-75. Combination responses indicated by 8x8 matrix informing on viability after 24 h treatment determined by CellTiter-Glo assay. Each matrix is the average response of 3 independent tumours for each genotype. The sum of Bliss scores across the combination dose matrix is listed for each treatment condition.

**Figure S9** Testing synergy between S63845 and other drugs. Viability of WT/*MLL-AF9* (left), *Mcl-1tg/MLL-AF9* (middle) and *BCL-2tg/MLL-AF9* (right) primary AML cell lines treated with S63845 plus one of cytarabine, bortezomib, flavopiridol, dinaciclib or PIK-75. Combination responses indicated by 8x8 matrix informing on viability after 24 h treatment determined by CellTiter-Glo assay. Each matrix is the average response of 3 independent tumours for each genotype. The sum of Bliss scores across the combination dose matrix is listed for each treatment condition.

**Supplementary Table S1 Haemopoietic composition of mice 3 weeks post reconstitution**

| Organ/cell type                                      | WT/GFP           | <i>Mcl-1</i> tg/GFP          | <i>BCL-2</i> tg/GFP           | WT/ <i>MLL-AF9</i>            | <i>Mcl-1</i> tg/ <i>MLL-AF9</i>   | <i>BCL-2</i> tg/ <i>MLL-AF9</i> |
|------------------------------------------------------|------------------|------------------------------|-------------------------------|-------------------------------|-----------------------------------|---------------------------------|
| <b>Spleen</b>                                        |                  |                              |                               |                               |                                   |                                 |
| <b>Total Cells</b>                                   | <b>133±90</b>    | <b>124±84</b>                | <b>151±67</b>                 | <b>148±54</b>                 | <b>291±174</b>                    | <b>290±216</b>                  |
| CD4 <sup>+</sup> CD8 <sup>-</sup>                    | 14.9±7.2         | 12.8±8.3                     | 11.5±4.8                      | 12.3±8.2                      | 14.4±6.0                          | 12.5±4.5                        |
| CD4 <sup>-</sup> CD8 <sup>+</sup>                    | 9.19±4.46        | 7.60±4.18                    | 7.31±3.40                     | 7.02±4.92                     | 7.84±3.93                         | 6.58±2.66                       |
| B220 <sup>+</sup> IgM <sup>-</sup> /IgD <sup>-</sup> | 3.82±6.27        | 8.13±8.94                    | 12.9±6.4 <sup>^</sup>         | 3.59±2.66                     | 7.87±4.80                         | 13.6±9.6                        |
| B220 <sup>+</sup> IgM <sup>+</sup> /IgD <sup>+</sup> | 20.4±11.9        | 45.6±34.7                    | 84.3±43.7 <sup>^^</sup>       | 14.8±6.9                      | 35.3±16.8 <sup>°</sup>            | 63.2±23.0 <sup>°°</sup>         |
| Mac1 <sup>+</sup>                                    | 3.66±2.03        | 4.84±4.33                    | 5.15±2.33                     | 12.4±8.7                      | 26.2±22.4 <sup>*</sup>            | 50.0±58.2                       |
| Mac1 <sup>+</sup> Gr1 <sup>+</sup>                   | 12.8±8.3         | 9.99±9.00                    | 6.46±3.13                     | 55.2±26.5 <sup>*</sup>        | 157±129 <sup>*</sup>              | 122±156                         |
| <b>BM</b>                                            |                  |                              |                               |                               |                                   |                                 |
| <b>Total Cells</b>                                   | <b>51.4±10.9</b> | <b>66.3±11.6<sup>^</sup></b> | <b>75.9±13.6<sup>^^</sup></b> | <b>72.2±10.6<sup>**</sup></b> | <b>88.8±17.2<sup>*</sup></b>      | <b>86.6±21.2</b>                |
| B220 <sup>+</sup> IgM <sup>-</sup> /IgD <sup>-</sup> | 2.89±1.97        | 9.09±6.63                    | 18.4±6.37 <sup>^^^</sup>      | 2.05±1.31                     | 2.44±1.23                         | 6.90±6.69                       |
| B220 <sup>+</sup> IgM <sup>+</sup> /IgD <sup>+</sup> | 0.811±0.543      | 3.51±3.99                    | 8.73±7.39 <sup>^</sup>        | 0.684±0.446                   | 0.571±0.345                       | 2.03±2.21 <sup>*</sup>          |
| Mac1 <sup>+</sup>                                    | 1.74±0.470       | 2.18±0.499                   | 5.26±6.55                     | 14.8±9.67 <sup>*</sup>        | 16.4±13.9 <sup>*</sup>            | 22.4±16.9                       |
| Mac1 <sup>+</sup> Gr1 <sup>+</sup>                   | 14.4±4.00        | 19.6±6.30                    | 21.6±11.1                     | 33.7±13.7 <sup>*</sup>        | 48.4±16.2 <sup>**</sup>           | 43.5±18.2 <sup>*</sup>          |
| <b>Peripheral Blood</b>                              |                  |                              |                               |                               |                                   |                                 |
| <b>Total Cells</b>                                   | <b>1.83±0.71</b> | <b>2.19±1.19</b>             | <b>4.57±5.71<sup>^</sup></b>  | <b>11.4±8.3<sup>***</sup></b> | <b>67.3±66.8<sup>***°°°</sup></b> | <b>120±148<sup>***°°°</sup></b> |
| Mac1 <sup>+</sup>                                    | 0.23±0.20        | 0.21±0.20                    | 0.25±0.29                     | 1.45±1.31 <sup>***</sup>      | 15.2±18.9 <sup>***°°</sup>        | 32.7±38.6 <sup>***°°°</sup>     |
| Mac1 <sup>+</sup> Gr1 <sup>+</sup>                   | 0.28±0.19        | 0.28±0.18                    | 0.35±0.26                     | 6.90±6.25 <sup>***</sup>      | 41.4±47.5 <sup>***°°</sup>        | 61.6±88.0 <sup>***°°</sup>      |
| CD4 <sup>+</sup> CD8 <sup>-</sup>                    | nd               | nd                           | nd                            | nd                            | nd                                | nd                              |
| CD4 <sup>-</sup> CD8 <sup>+</sup>                    | nd               | nd                           | nd                            | nd                            | nd                                | nd                              |
| B220 <sup>+</sup> IgM <sup>-</sup> /IgD <sup>-</sup> | nd               | nd                           | nd                            | nd                            | nd                                | nd                              |
| B220 <sup>+</sup> IgM <sup>+</sup> /IgD <sup>+</sup> | nd               | nd                           | nd                            | nd                            | nd                                | nd                              |

Nucleated cells × 10<sup>6</sup>, except peripheral blood cells (× 10<sup>6</sup>/mL) from mice 3 wk post reconstitution  
n = 5-8 mice per genotype for spleen and BM and n=17-27 mice per genotype for peripheral blood.

Student's T-test with Welch's correction:

Significantly different from GFP of same genotype: \*\*\**p*≤0.001; \*\**p*≤0.01; \**p*≤0.05

Significantly different from WT/GFP (only calculated for *Mcl-1*tg/GFP and *BCL-2*tg/GFP): ^^*p*≤0.001; ^*p*≤0.01; *p*≤0.05

Significantly different from WT/*MLL-AF9* (only calculated for *Mcl-1*tg/*MLL-AF9* and *BCL-2*tg/*MLL-AF9*): °°*p*≤0.001; °*p*≤0.01; °°*p*≤0.05



**Supplementary Table S2 Haemopoietic composition of sick *MLL-AF9* AML mice and healthy control mice**

| Organ/cell type                                      | WT/GFP           | <i>Mcl-1tg</i> /GFP | <i>BCL-2tg</i> /GFP    | WT/ <i>MLL-AF9</i> | <i>Mcl-1tg/MLL-AF9</i>          | <i>BCL-2tg/MLL-AF9</i>            |
|------------------------------------------------------|------------------|---------------------|------------------------|--------------------|---------------------------------|-----------------------------------|
| <b>Spleen</b>                                        |                  |                     |                        |                    |                                 |                                   |
| <b>Total cells</b>                                   | <b>74.7±36.6</b> | <b>156±200</b>      | <b>104±33</b>          | <b>501±146***</b>  | <b>730±198***<sup>ooo</sup></b> | <b>724±159***<sup>ooo</sup></b>   |
| CD4 <sup>+</sup> CD8 <sup>-</sup>                    | 20.8±10.4        | 37.5±34.1           | 24.8±11.5              | 21.4±15.9          | 33.4±28.1                       | 27.8±8.9                          |
| CD4 <sup>+</sup> CD8 <sup>+</sup>                    | 11.0±5.3         | 22.9±20.9           | 12.9±5.9               | 10.8±8.1           | 20.1±18.8                       | 19.5±9.5                          |
| B220 <sup>+</sup> IgM <sup>-</sup> /IgD <sup>-</sup> | 1.65±1.09        | 3.78±4.87           | 16.4±19.4 <sup>^</sup> | 10.8±11.9*         | 21.4±26.2                       | 27.0±29.0                         |
| B220 <sup>+</sup> IgM <sup>+</sup> /IgD <sup>+</sup> | 36.0±17.9        | 80.8±130            | 40.6±11.8              | 25.6±18.5          | 61.4±44.5                       | 62.7±31.4 <sup>o</sup>            |
| Mac1 <sup>+</sup> Gr1 <sup>-</sup>                   | 3.23±2.78        | 5.46±3.94           | 4.52±4.07              | 250±130***         | 213±168***                      | 237±85***                         |
| Mac1 <sup>+</sup> Gr1 <sup>+</sup>                   | 2.61±0.77        | 5.46±7.73           | 2.90±1.03              | 156±95.6***        | 386±142*** <sup>ooo</sup>       | 369±101*** <sup>ooo</sup>         |
| Mac1 <sup>+</sup> F4/80 <sup>+</sup>                 | 1.78±1.90        | 2.68±2.82           | 2.24±1.86              | 193±129***         | 288±199***                      | 314±75*** <sup>ooo</sup>          |
| <b>BM</b>                                            |                  |                     |                        |                    |                                 |                                   |
| <b>Total cells</b>                                   | <b>64.3±19.9</b> | <b>66.1±19.1</b>    | <b>68.2±22.0</b>       | <b>62.9±13.9</b>   | <b>74.6±19.1</b>                | <b>94.1±22.2***<sup>ooo</sup></b> |
| B220 <sup>+</sup> IgM <sup>-</sup> /IgD <sup>-</sup> | 3.82±2.01        | 2.45±1.71           | 6.61±5.94              | 0.93±1.62**        | 1.69±2.70                       | 1.63±1.35*                        |
| B220 <sup>+</sup> IgM <sup>+</sup> /IgD <sup>+</sup> | 5.57±2.73        | 6.42±4.13           | 8.58±7.47              | 0.34±0.81***       | 0.11±0.09***                    | 0.16±0.17**                       |
| Mac1 <sup>+</sup> Gr1 <sup>-</sup>                   | 3.43±5.75        | 3.58±3.03           | 2.63±1.27              | 33.3±10.1***       | 25.2±7.7*** <sup>o</sup>        | 38.8±17.0***                      |
| Mac1 <sup>+</sup> Gr1 <sup>+</sup>                   | 34.3±16.0        | 33.5±13.7           | 31.0±13.9              | 20.6±14.7*         | 42.1±18.4 <sup>ooo</sup>        | 48.0±12.7*** <sup>ooo</sup>       |
| Mac1 <sup>+</sup> F4/80 <sup>+</sup>                 | 17.4±13.3        | 15.4±14.9           | 16.0±15.0              | 28.0±16.1          | 34.3±19.0**                     | 60.0±19.8*** <sup>ooo</sup>       |
| cKit <sup>+</sup>                                    | 3.40±2.98        | 3.15±2.92           | 1.88±1.80              | 12.7±20.6          | 1.53±1.02                       | 24.5±40.5                         |
| <b>Blood</b>                                         |                  |                     |                        |                    |                                 |                                   |
| <b>Total cells</b>                                   | <b>9.07±2.17</b> | <b>11.8±7.0</b>     | <b>19.5±22.5</b>       | <b>86.9±88.2*</b>  | <b>303±165***<sup>ooo</sup></b> | <b>407±196***<sup>ooo</sup></b>   |
| CD4 <sup>+</sup> CD8 <sup>-</sup>                    | 2.78±0.61        | 3.10±1.67           | 3.55±2.30              | 8.64±13.1          | 11.5±21.1                       | 8.17±3.81                         |
| CD4 <sup>+</sup> CD8 <sup>+</sup>                    | 1.69±0.44        | 2.36±1.39           | 2.64±2.42              | 3.59±3.04          | 5.10±2.76*                      | 7.10±2.59*                        |
| B220 <sup>+</sup> IgM <sup>-</sup> /IgD <sup>-</sup> | 0.19±0.26        | 0.22±0.28           | 1.24±1.32 <sup>^</sup> | 1.34±1.28          | 6.89±11.6                       | 11.1±15.9                         |
| B220 <sup>+</sup> IgM <sup>+</sup> /IgD <sup>+</sup> | 3.27±1.43        | 4.54±3.78           | 9.37±14.7              | 3.05±1.58          | 9.41±5.41 <sup>o</sup>          | 12.7±4.5 <sup>o</sup>             |
| Mac1 <sup>+</sup> Gr1 <sup>-</sup>                   | 0.67±0.21        | 0.92±0.46           | 1.48±1.06 <sup>^</sup> | 22.4±23.7**        | 113±107*** <sup>ooo</sup>       | 153±100*** <sup>ooo</sup>         |
| Mac1 <sup>+</sup> Gr1 <sup>+</sup>                   | 0.74±0.37        | 0.83±0.38           | 0.72±0.27              | 54.7±69.2*         | 128±82*** <sup>o</sup>          | 157±106*** <sup>ooo</sup>         |
| Mac1 <sup>+</sup> F4/80 <sup>+</sup>                 | 0.34±0.16        | 0.29±0.19           | 0.43±0.28              | 9.10±6.58***       | 34.8±31.8** <sup>o</sup>        | 61.6±72.8* <sup>o</sup>           |

Nucleated cells × 10<sup>6</sup>, except peripheral blood cells (× 10<sup>6</sup>/mL) from sick *MLL-AF9* AML mice and healthy GFP control mice;

n = 5-18 mice per genotype

Student's T-test with Welch's correction:

Significantly different from GFP of same genotype: \*\*\**p*≤0.001; \*\**p*≤0.01; \**p*≤0.05

Significantly different from WT/GFP (only calculated for *Mcl-1tg*/GFP and *BCL-2tg*/GFP): ^^*p*≤0.001; ^*p*≤0.01; *p*≤0.05

Significantly different from WT/*MLL-AF9* (only calculated for *Mcl-1tg/MLL-AF9* and *BCL-2tg/MLL-AF9*): <sup>ooo</sup>*p*≤0.001; <sup>oo</sup>*p*≤0.01; <sup>o</sup>*p*≤0.05

**Supplementary Table S3. Transplantation of AMLs**

| Genotype               | 1° AML mouse | AML/2° recipient | 2° recipient survival (d) | 2° AML mouse | AML/3° recipient | 3° recipient survival (d) |
|------------------------|--------------|------------------|---------------------------|--------------|------------------|---------------------------|
| <b>WT/MLL-AF9</b>      | #5           | 4/4              | 36 39 39 42               |              |                  |                           |
|                        |              |                  |                           | #10          | 3/3              | 14 14 14                  |
|                        | #6           | 5/5              | 13 13 13 13 13            |              |                  |                           |
|                        |              |                  |                           | #47          | 3/3              | 14 14 14                  |
|                        | #1501        | 7/7              | 13 13 13 13 15 17 18      |              |                  |                           |
|                        |              |                  |                           | #2347        | 2/2              | 14 16                     |
|                        | #1533        | 3/3              | 15 15 15                  |              |                  |                           |
|                        | #1742        | 3/3              | 26 26 50                  |              |                  |                           |
|                        |              |                  |                           | #2536        | 3/3              | 13 13 13                  |
| #1745                  | 3/3          | 13 14 14         |                           |              |                  |                           |
|                        |              |                  | #2557                     | 3/3          | 11 12 13         |                           |
| #2036                  | 4/4          | 18 18 18 18      |                           |              |                  |                           |
| <b>Mcl-1tg/MLL-AF9</b> | #14          | 5/5              | 28 28 33 38 38            |              |                  |                           |
|                        | #16          | 4/4              | 28 34 36 36               |              |                  |                           |
|                        |              |                  |                           | #14          | 3/3              | 14 14 14                  |
|                        | #17          | 5/5              | 50 50 50 50 50            |              |                  |                           |
|                        |              |                  |                           | #56          | 3/3              | 16 16 16                  |
|                        | #18          | 5/5              | 34 34 38 38 44            |              |                  |                           |
|                        | #1766        | 3/3              | 24 24 24                  |              |                  |                           |
|                        |              |                  | #2602                     | 3/3          | 14 14 14         |                           |
| <b>BCL-2tg/MLL-AF9</b> | #19          | 4/4              | 28 28 30 33               | #2           |                  |                           |
|                        | #22          | 4/4              | 34 34 34 34               |              |                  |                           |
|                        | #23          | 5/5              | 33 33 34 34               |              |                  |                           |
|                        |              |                  |                           | #63          | 3/3              | 25 25 33                  |
|                        | #24          | 5/5              | 34 34 34 34               |              |                  |                           |
|                        |              |                  |                           | #66          | 3/3              | 25 25 25                  |
|                        | #1563        | 2/2              | 19 19                     |              |                  |                           |
|                        |              |                  |                           | #2357        | 3/3              | 15 16 16                  |
| #2028                  | 4/4          | 20 20 24 26      |                           |              |                  |                           |

Primary AMLs were injected via the tail vein into immunocompetent syngeneic secondary recipients ( $2 \times 10^6$  spleen cells / recipient for each AML) and secondary AMLs were transplanted into immunocompetent syngeneic tertiary recipients ( $0.5 \times 10^6$  bone marrow cells / recipient for AML #10, 47, 2259, 6, 14, 56, 2 and 63;  $1 \times 10^6$  spleen cells / recipient for AML #2347, 2536, 2602, 2357). Table summarises efficiency of transplantation and time between transplant and ethical endpoint.

## SUPPLEMENTARY REFERENCES

1. Campbell KJ, Bath ML, Turner ML, et al. Elevated Mcl-1 perturbs lymphopoiesis, promotes transformation of hematopoietic stem/progenitor cells, and enhances drug resistance. *Blood*. 2010;116(17):3197-3207.
2. Ogilvy S, Metcalf D, Print CG, Bath ML, Harris AW, Adams JM. Constitutive bcl-2 expression throughout the hematopoietic compartment affects multiple lineages and enhances progenitor cell survival. *Proc Natl Acad Sci U S A*. 1999;96(26):14943-14948.
3. Levenson JD, Phillips DC, Mitten MJ, et al. Exploiting selective BCL-2 family inhibitors to dissect cell survival dependencies and define improved strategies for cancer therapy. *Sci Transl Med*. 2015;7(279):279ra240.
4. Fouquier J, Guedj M. Analysis of drug combinations: current methodological landscape. *Pharmacol Res Perspect*. 2015;3(3):e00149.

# Supplementary Figure S1 Anstee *et al*

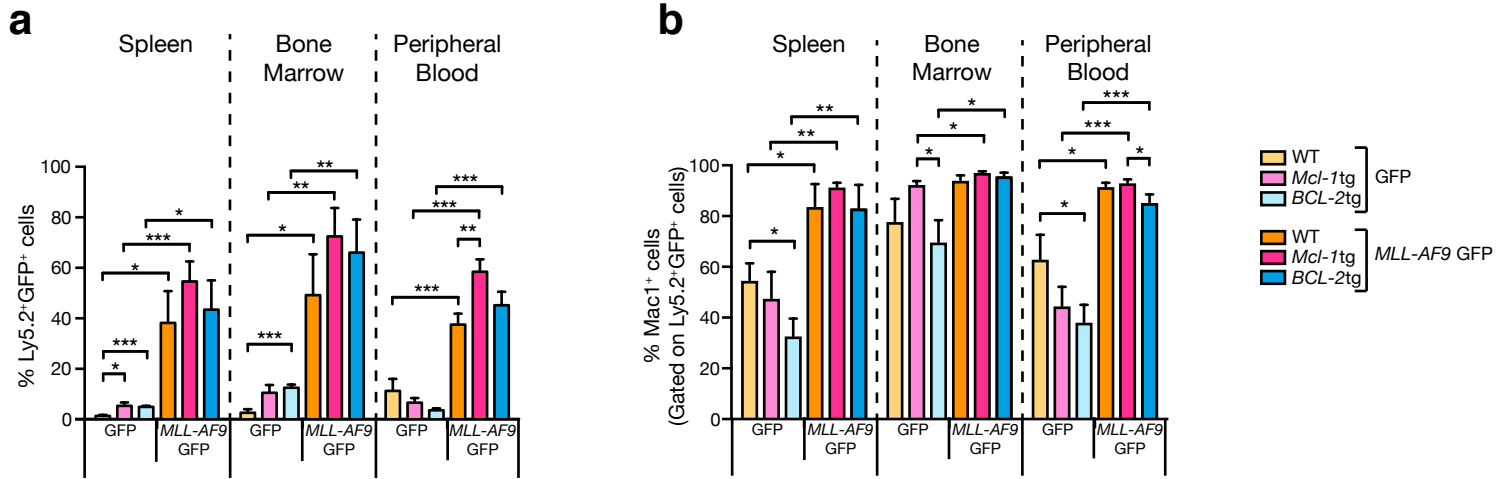

# Supplementary Figure S2 Anstee *et al*

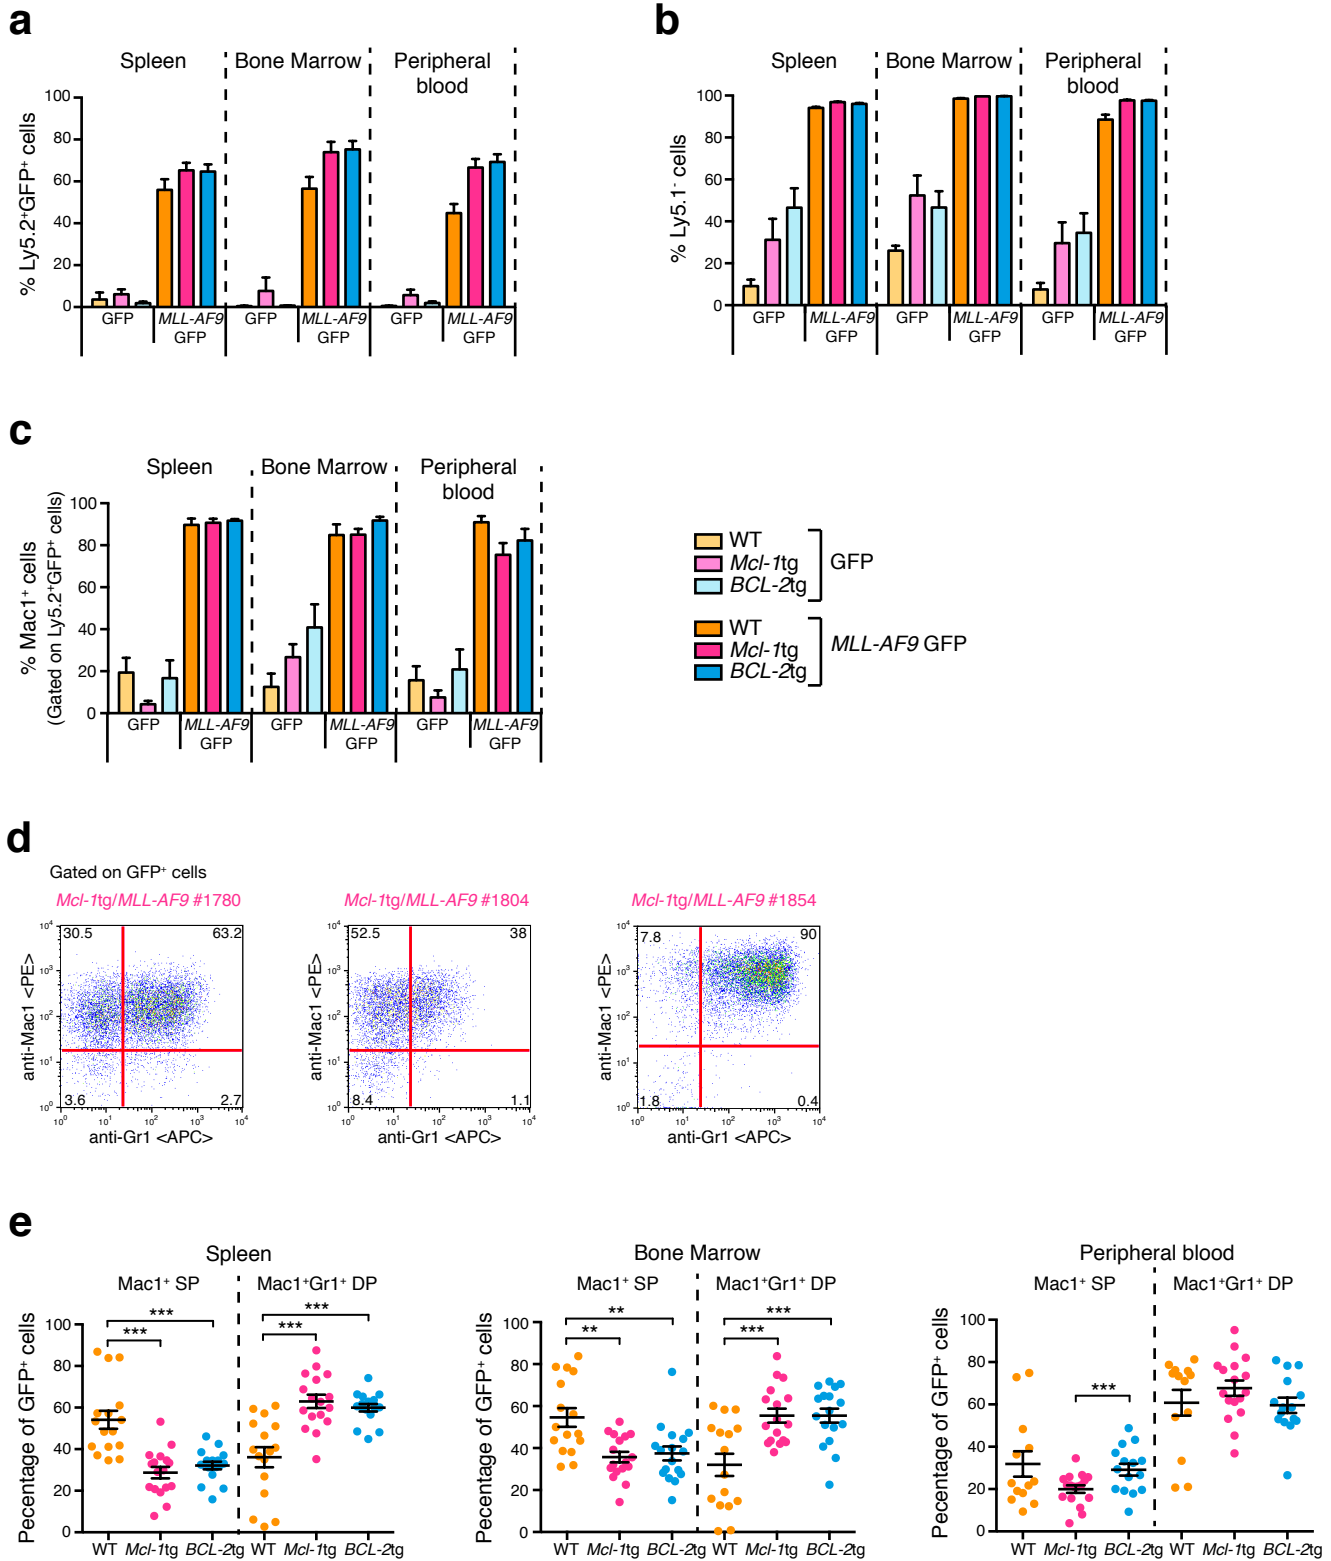

**Supplementary Figure S3**  
Anstee *et al*

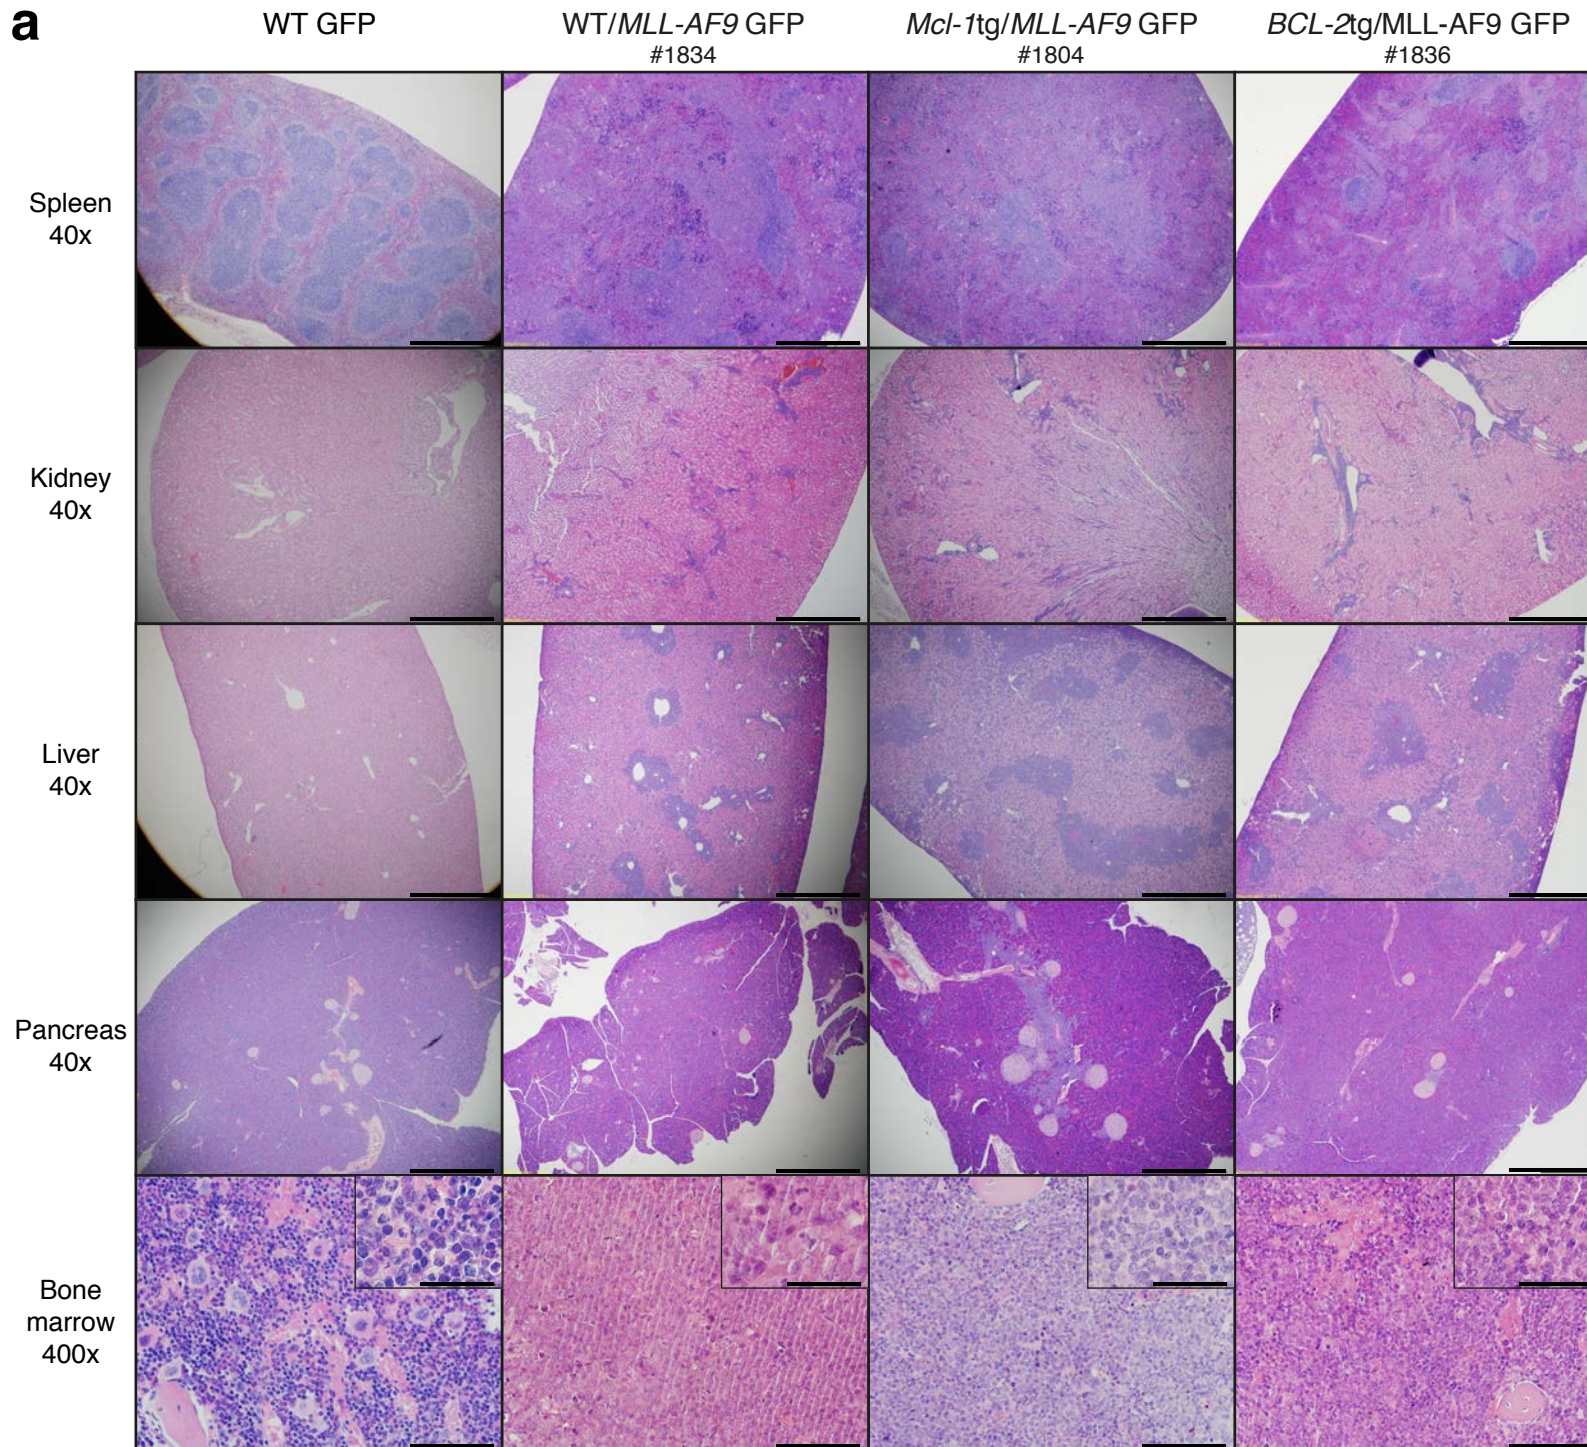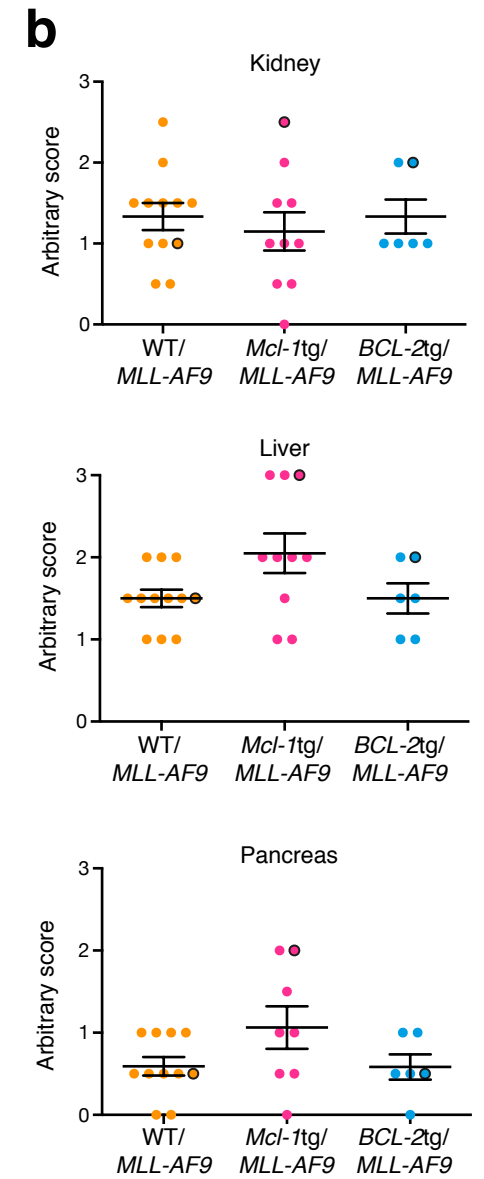

# Supplementary Figure S4 Anstee *et al*

**a**

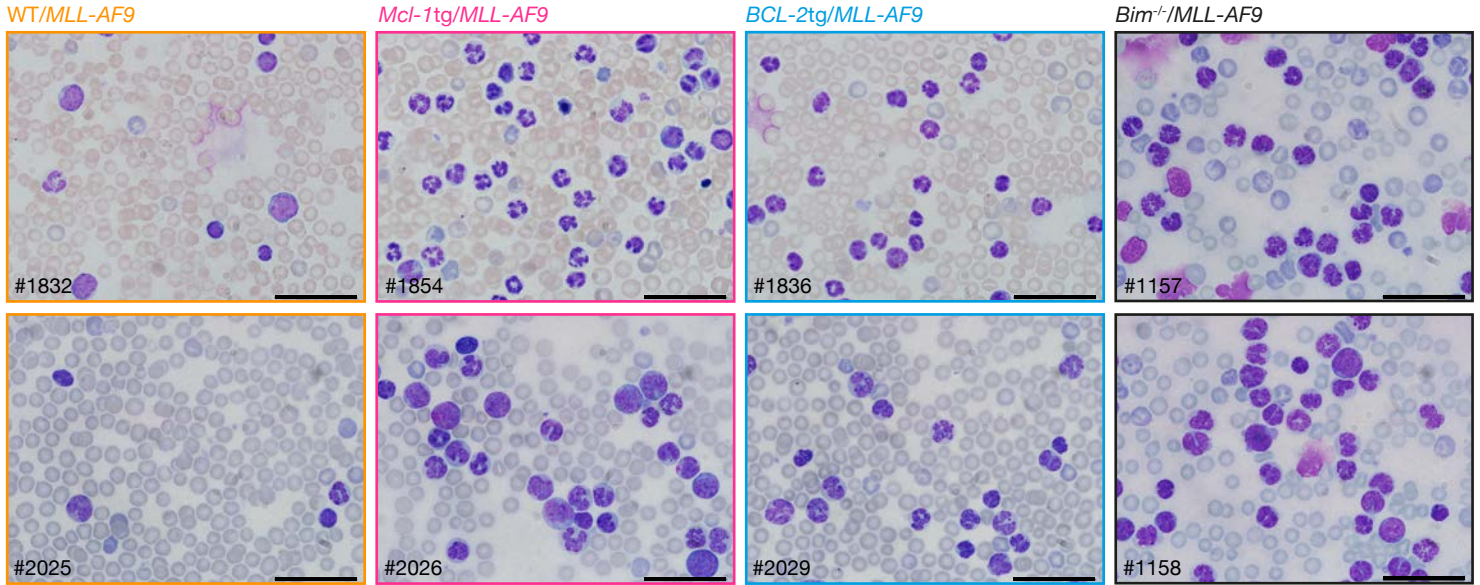

**b**

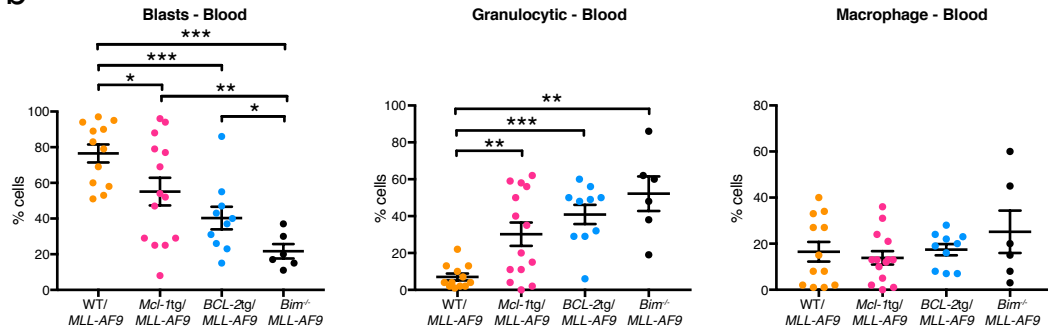

**c**

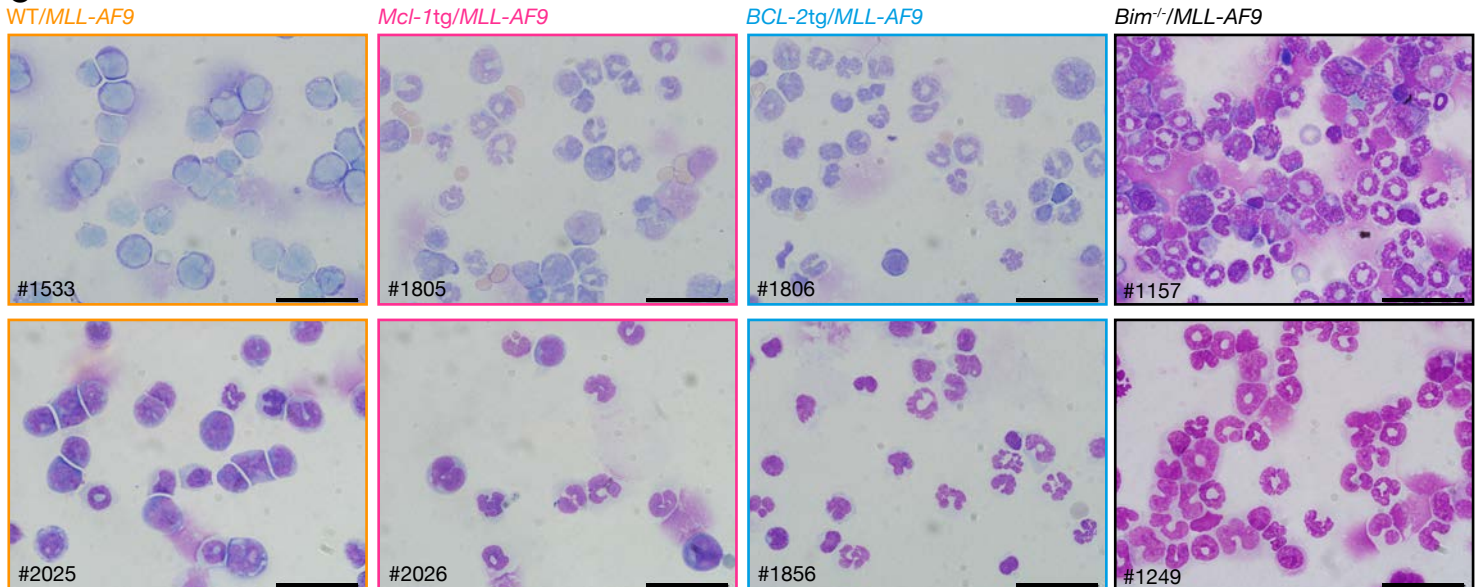

**d**

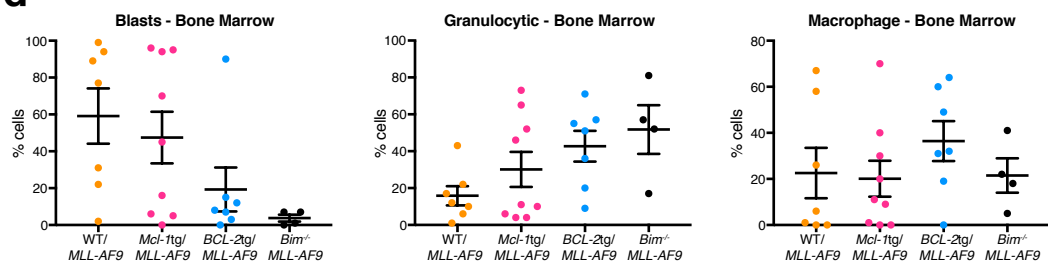

# Supplementary Figure S5 Anstee *et al*

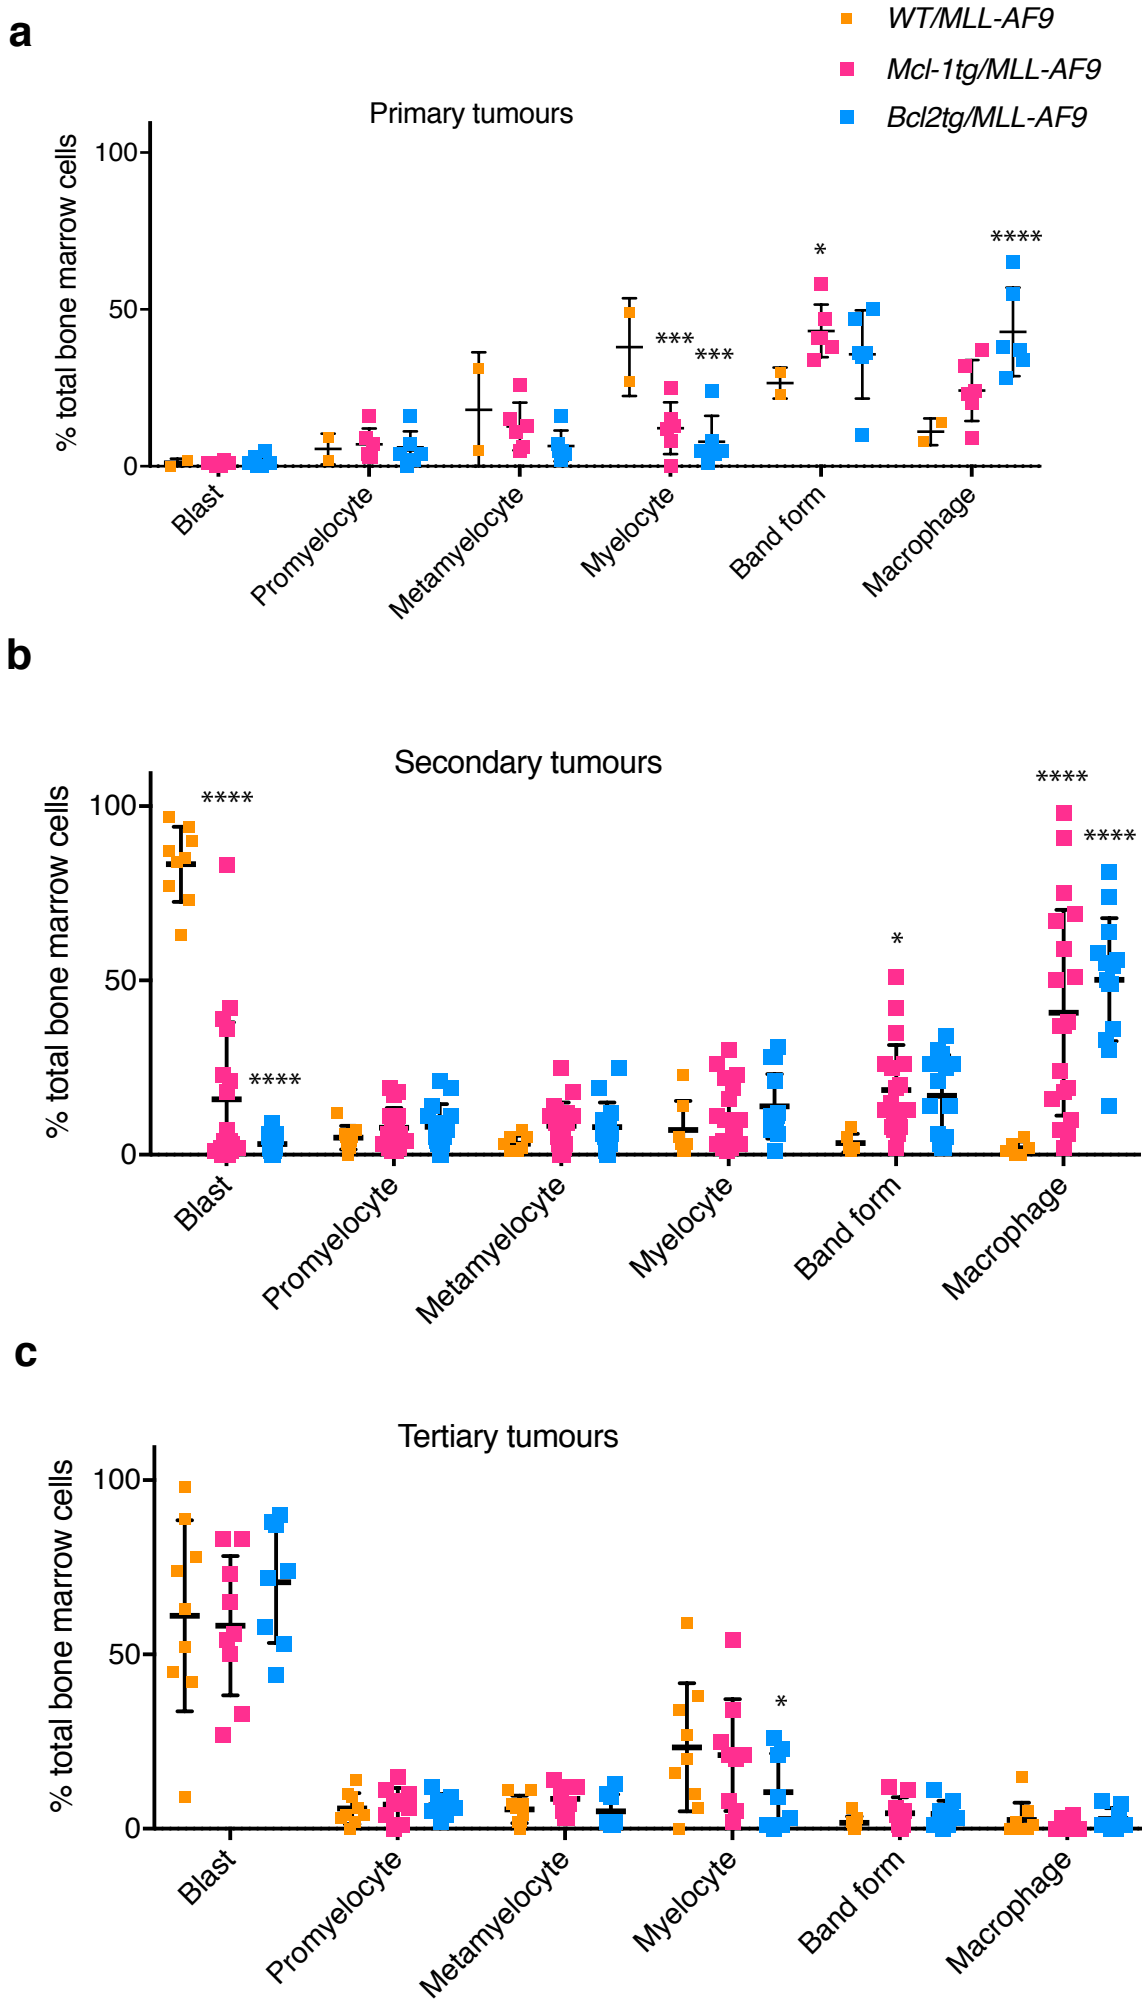



# Supplementary Figure S6 Anstee *et al*

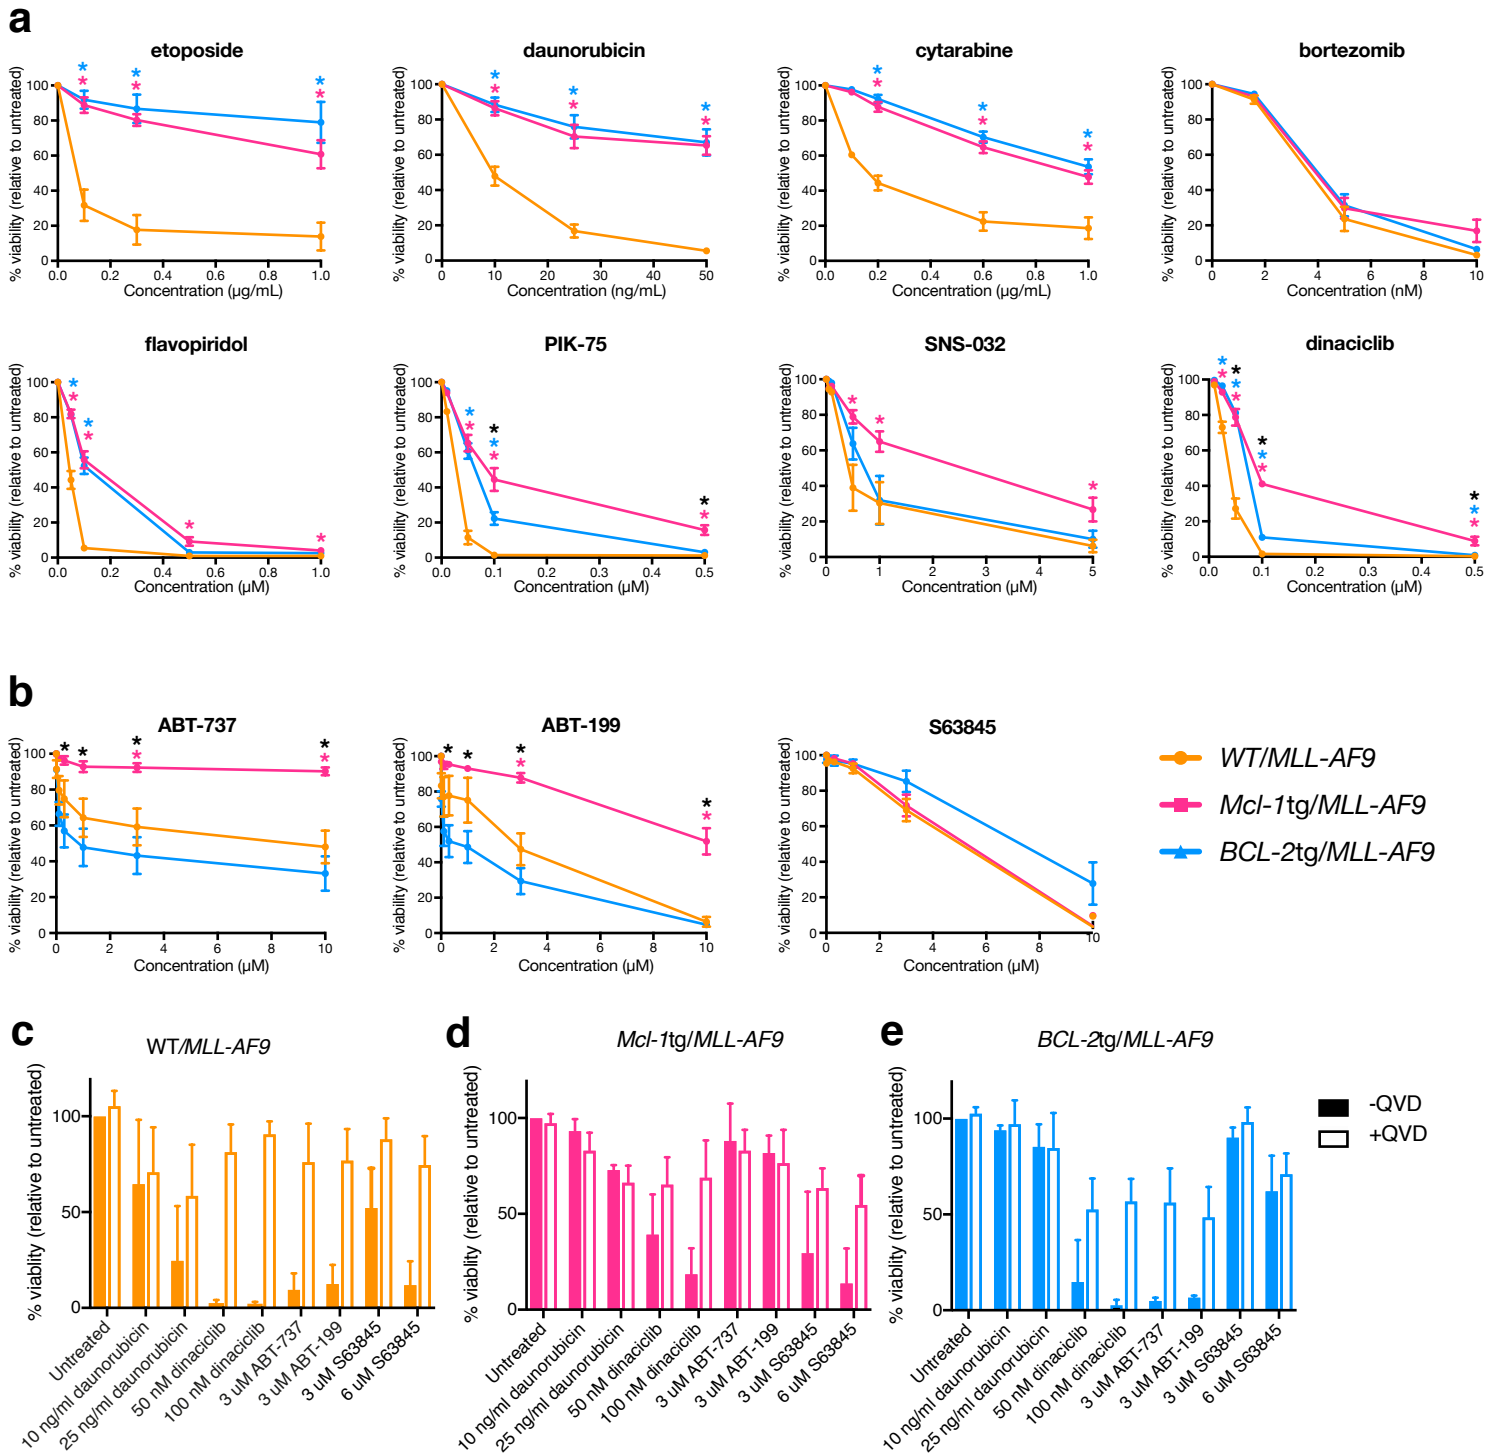

# Supplementary Figure S7 Anstee *et al*

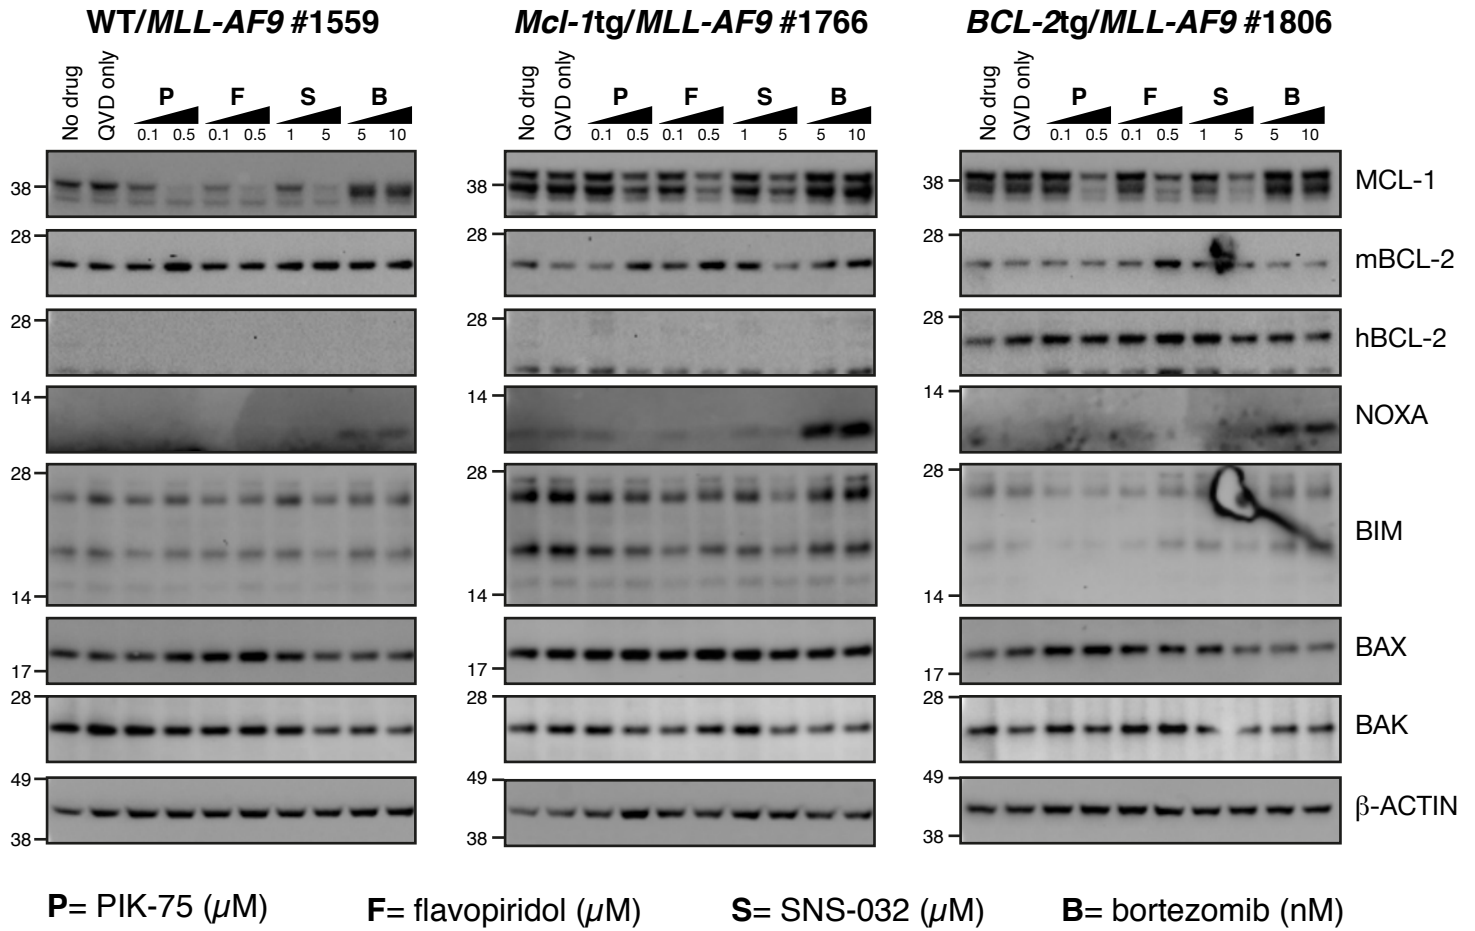

# Supplementary Figure S8 Anstee *et al*

## WT/MLL-AF9

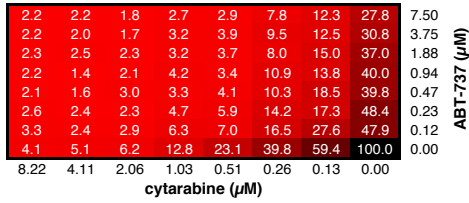

cytarabine ( $\mu\text{M}$ )  
Bliss sum = 204.58

## Mcl-1tg/MLL-AF9

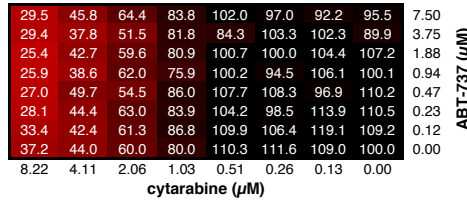

cytarabine ( $\mu\text{M}$ )  
Bliss sum = 58.82

## BCL-2tg/MLL-AF9

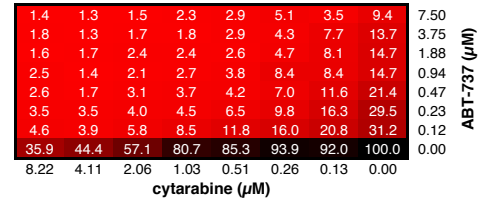

cytarabine ( $\mu\text{M}$ )  
Bliss sum = 478.04

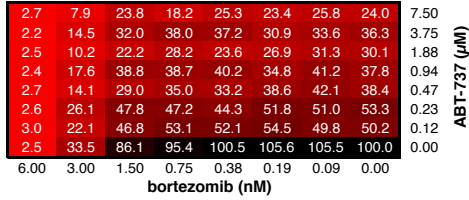

bortezomib (nM)  
Bliss sum = -87.21

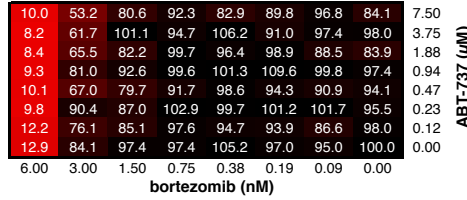

bortezomib (nM)  
Bliss sum = -49.79

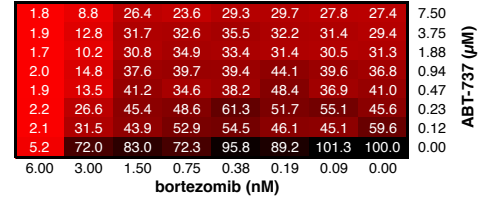

bortezomib (nM)  
Bliss sum = 81.07

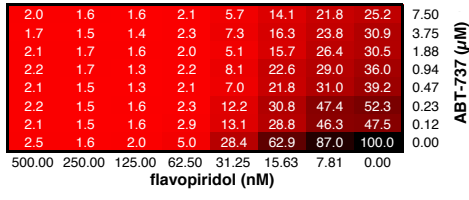

flavopiridol (nM)  
Bliss sum = 40.68

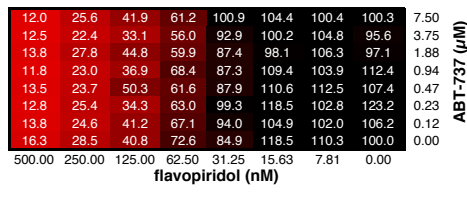

flavopiridol (nM)  
Bliss sum = 7.44

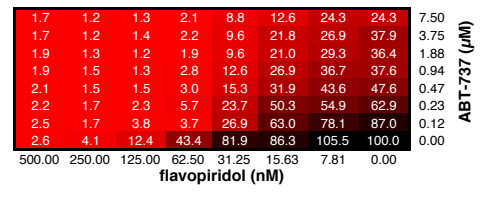

flavopiridol (nM)  
Bliss sum = 536.74

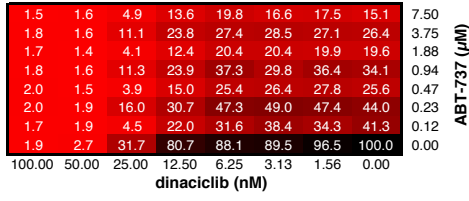

dinaciclib (nM)  
Bliss sum = 36.39

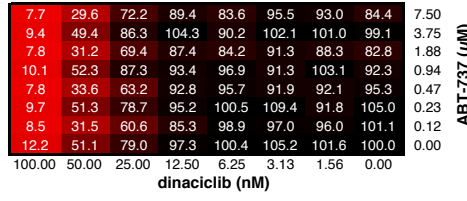

dinaciclib (nM)  
Bliss sum = -28.41

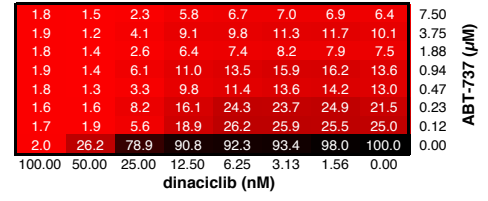

dinaciclib (nM)  
Bliss sum = 41.36

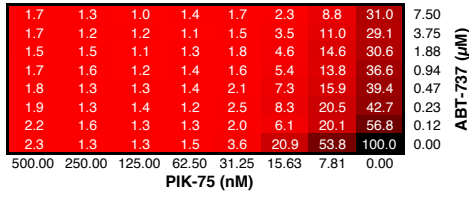

PIK-75 (nM)  
Bliss sum = 42.68

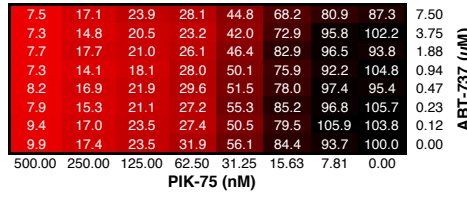

PIK-75 (nM)  
Bliss sum = 88.74

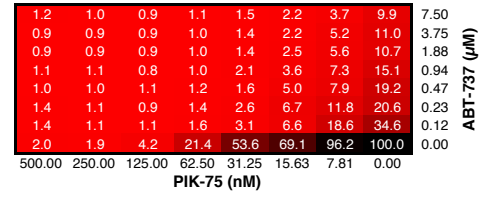

# Supplementary Figure S9 Anstee *et al*

## WT/MLL-AF9

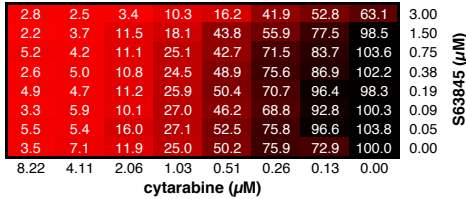

Bliss sum = 3.17

## Mcl-1tg/MLL-AF9

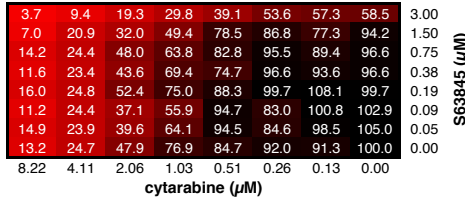

Bliss sum = 140.49

## BCL-2tg/MLL-AF9

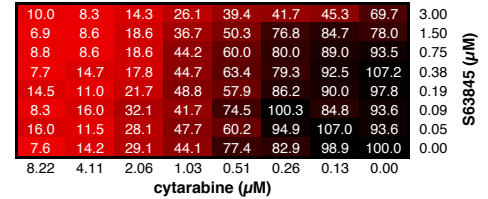

Bliss sum = 190.07

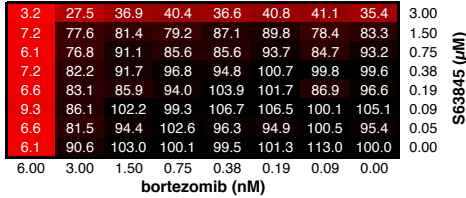

Bliss sum = -109.64

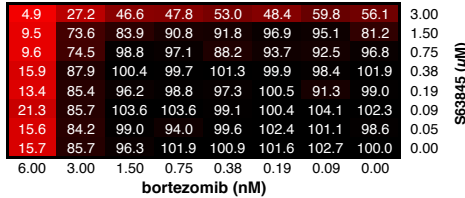

Bliss sum = -50.08

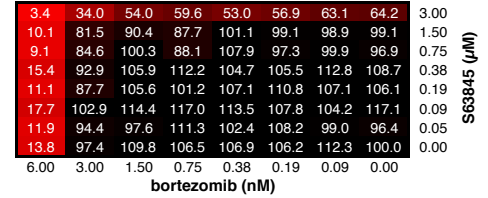

Bliss sum = 43.44

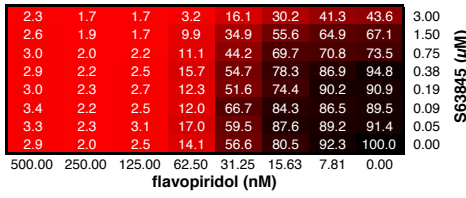

Bliss sum = -27.20

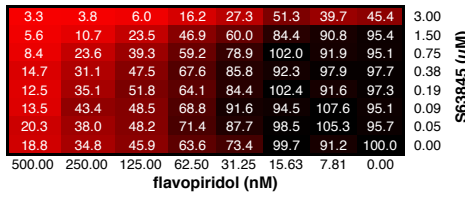

Bliss sum = 157.06

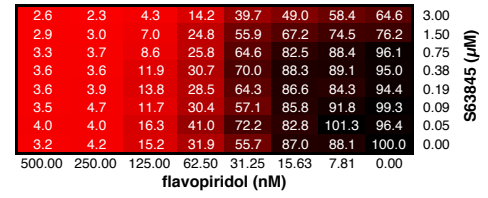

Bliss sum = 70.91

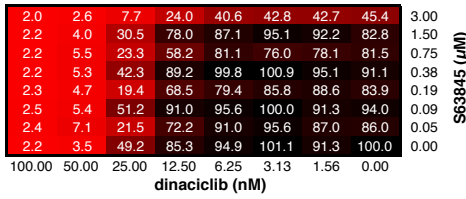

Bliss sum = 181.53

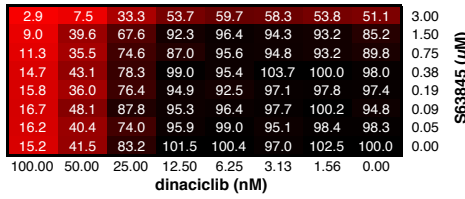

Bliss sum = 24.06

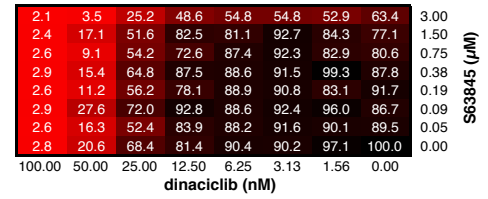

Bliss sum = 87.72

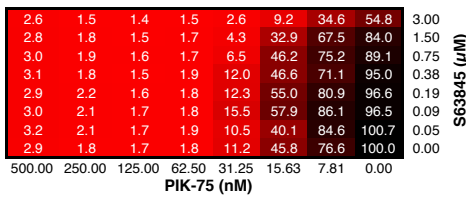

Supplement: 41418_2018_209_MOESM1_ESM.pdf [file 41418_2018_209_MOESM1_ESM.pdf]
